# Supplementary material
Source: PubMed Central journal article supplement (PMC8281020)
Supplement: jamacardiol-e212247-s003.pdf [file jamacardiol-e212247-s003.pdf]

# Statistical Analysis Plan (SAP)

## Paroxetine-mediated GRK2 inhibition to reduce cardiac remodeling after acute myocardial infarction (CARE-AMI): a randomized controlled pilot study

### CARE-AMI

### Administrative Information

|                            |                         |
|----------------------------|-------------------------|
| Project number:            | 1425                    |
| Trial registration number: | NCT03274752             |
| SAP version:               | V1.0 of 13.11.2020      |
| Protocol version:          | Version 7.0, 24.01.2020 |

|          |                   |               |
|----------|-------------------|---------------|
| CTU Bern | SAP for: CARE-AMI | Version: v1.0 |
|----------|-------------------|---------------|

|          |                                           |                        |              |
|----------|-------------------------------------------|------------------------|--------------|
| CTU Bern | Template: Statistical Analysis Plan (SAP) | Version: 1             | Page 1 of 27 |
|          | Code: CS_STA_TEM-11                       | Valid from: 13.11.2020 |              |

10 **Contributors**

| Name          | Affiliation | Role in SAP writing |
|---------------|-------------|---------------------|
| Flora Babongo | CTU Bern    | Author              |
| Dik Heg       | CTU Bern    | Reviewer            |
|               |             |                     |

11

12

13 **Revision history**

| Revision | Justification | Timing |
|----------|---------------|--------|
|          |               |        |
|          |               |        |
|          |               |        |

14

15

16 **Approved by**

| Name                          | Affiliation              | Study Role           | Date and Signature (wet ink) |
|-------------------------------|--------------------------|----------------------|------------------------------|
| Flora Babongo                 | CTU Bern                 | Trial Statistician   |                              |
| Dik Heg                       | CTU Bern                 | Senior Statistician  |                              |
| Prof. Dr. med. Thomas Pilgrim | Bern University Hospital | Sponsor-Investigator |                              |

17

|                 |                   |               |
|-----------------|-------------------|---------------|
| <b>CTU Bern</b> | SAP for: CARE-AMI | Version: v1.0 |
|-----------------|-------------------|---------------|

|                 |                                           |                        |                     |
|-----------------|-------------------------------------------|------------------------|---------------------|
| <b>CTU Bern</b> | Template: Statistical Analysis Plan (SAP) | Version: 1             |                     |
|                 | Code: CS_STA_TEM-11                       | Valid from: 13.11.2020 | <b>Page 2 of 27</b> |

## 18 Contents

|    |           |                                                                                       |                                     |
|----|-----------|---------------------------------------------------------------------------------------|-------------------------------------|
| 19 | <b>1.</b> | <b>Introduction.....</b>                                                              | <b>5</b>                            |
| 20 | 1.1       | Background and rationale .....                                                        | 5                                   |
| 21 | 1.2       | Objectives.....                                                                       | 5                                   |
| 22 | 1.2.1     | Primary objective .....                                                               | <b>Error! Bookmark not defined.</b> |
| 23 | <b>2.</b> | <b>Study methods .....</b>                                                            | <b>6</b>                            |
| 24 | 2.1       | Trial design .....                                                                    | 6                                   |
| 25 | 2.2       | Randomization.....                                                                    | 6                                   |
| 26 | 2.3       | Sample size .....                                                                     | 6                                   |
| 27 | 2.4       | Framework.....                                                                        | 6                                   |
| 28 | 2.5       | Statistical interim analyses and stopping guidance .....                              | 7                                   |
| 29 | 2.6       | Timing of final analysis .....                                                        | 7                                   |
| 30 | 2.7       | Timing of outcome assessments .....                                                   | <b>Error! Bookmark not defined.</b> |
| 31 | 2.8       | Blinding.....                                                                         | 7                                   |
| 32 | <b>3.</b> | <b>Study product/intervention .....</b>                                               | <b>Error! Bookmark not defined.</b> |
| 33 | 3.1       | Experimental and control interventions .....                                          | <b>Error! Bookmark not defined.</b> |
| 34 | 3.1.1     | Experimental intervention .....                                                       | <b>Error! Bookmark not defined.</b> |
| 35 | 3.1.2     | Control intervention.....                                                             | <b>Error! Bookmark not defined.</b> |
| 36 | 3.1.3     | Dose Rationale: Rationale for the intended purpose in study (pre-market MD) .....     | <b>Error!</b>                       |
| 37 |           | <b>Bookmark not defined.</b>                                                          |                                     |
| 38 | 3.2       | Benefits / Risks.....                                                                 | <b>Error! Bookmark not defined.</b> |
| 39 | 3.2.1     | Benefits .....                                                                        | <b>Error! Bookmark not defined.</b> |
| 40 | 3.2.2     | Risks .....                                                                           | <b>Error! Bookmark not defined.</b> |
| 41 | 3.3       | Safety .....                                                                          | <b>Error! Bookmark not defined.</b> |
| 42 | 3.3.1     | Definition and assessment of (serious) adverse events and other safety related events |                                     |
| 43 |           | <b>Error! Bookmark not defined.</b>                                                   |                                     |
| 44 | 3.3.2     | Reporting of serious adverse events (SAE) and other safety related events .....       | <b>Error!</b>                       |
| 45 |           | <b>Bookmark not defined.</b>                                                          |                                     |
| 46 | 3.3.3     | Follow up of (Serious) Adverse Events .....                                           | <b>Error! Bookmark not defined.</b> |
| 47 | <b>4.</b> | <b>Data management.....</b>                                                           | <b>8</b>                            |

|          |                   |               |
|----------|-------------------|---------------|
| CTU Bern | SAP for: CARE-AMI | Version: v1.0 |
|----------|-------------------|---------------|

|          |                                           |                        |              |
|----------|-------------------------------------------|------------------------|--------------|
| CTU Bern | Template: Statistical Analysis Plan (SAP) | Version: 1             |              |
|          | Code: CS_STA_TEM-11                       | Valid from: 13.11.2020 | Page 3 of 27 |

|    |           |                                                  |                                     |
|----|-----------|--------------------------------------------------|-------------------------------------|
| 48 | 4.1       | Data recording and keeping .....                 | <b>Error! Bookmark not defined.</b> |
| 49 | 4.2       | Data export .....                                | 8                                   |
| 50 | 4.3       | Data validation .....                            | 8                                   |
| 51 | 4.4       | Data preparation .....                           | 8                                   |
| 52 | <b>5.</b> | <b>Statistical principles .....</b>              | <b>9</b>                            |
| 53 | 5.1       | Analysis populations .....                       | 9                                   |
| 54 | 5.2       | Estimands .....                                  | <b>Error! Bookmark not defined.</b> |
| 55 | <b>6.</b> | <b>Trial Population .....</b>                    | <b>9</b>                            |
| 56 | 6.1       | Recruitment and screening .....                  | <b>Error! Bookmark not defined.</b> |
| 57 | 6.2       | Eligibility .....                                | 11                                  |
| 58 | 6.3       | Baseline patient characteristics .....           | 11                                  |
| 59 | 6.4       | Procedural characteristics (if applicable) ..... | 13                                  |
| 60 | 6.5       | Adherence and protocol deviations .....          | <b>Error! Bookmark not defined.</b> |
| 61 | 6.6       | Withdrawal/follow-up .....                       | 24                                  |
| 62 | <b>7.</b> | <b>Analysis .....</b>                            | <b>25</b>                           |
| 63 | 7.1       | Outcome definitions .....                        | 25                                  |
| 64 | 7.1.1     | Primary outcomes .....                           | 25                                  |
| 65 | 7.1.2     | Secondary outcomes .....                         | 25                                  |
| 66 | 7.1.3     | Safety outcomes .....                            | 25                                  |
| 67 | 7.2       | Analysis methods .....                           | 26                                  |
| 68 | 7.2.1     | Primary analysis .....                           | 26                                  |
| 69 | 7.2.2     | Secondary analyses .....                         | 26                                  |
| 70 | 7.2.3     | Safety analyses .....                            | 26                                  |
| 71 | 7.2.4     | Additional analyses .....                        | 26                                  |
| 72 | 7.2.5     | Assessment of statistical assumptions .....      | 26                                  |
| 73 | 7.3       | Missing data .....                               | 26                                  |
| 74 | 7.4       | Statistical software .....                       | 26                                  |
| 75 | 7.5       | Quality control .....                            | 27                                  |
| 76 | <b>8.</b> | <b>References .....</b>                          | <b>27</b>                           |
| 77 |           |                                                  |                                     |

|          |                   |               |
|----------|-------------------|---------------|
| CTU Bern | SAP for: CARE-AMI | Version: v1.0 |
|----------|-------------------|---------------|

|          |                                           |                        |              |
|----------|-------------------------------------------|------------------------|--------------|
| CTU Bern | Template: Statistical Analysis Plan (SAP) | Version: 1             |              |
|          | Code: CS_STA_TEM-11                       | Valid from: 13.11.2020 | Page 4 of 27 |

78 **1. Introduction**

79 **1.1 Background and rationale**

80

81 Cardiac remodeling is characterized by a composite of structural, geometric, molecular, and func-  
82 tional changes of the myocardium, and is an important determinant of heart failure and cardiovas-  
83 cular outcome in survivors of acute myocardial infarction. Progression of heart failure secondary to  
84 the remodeling process results from dysregulation of the G protein-coupled receptor (GPCR). Ex-  
85 cessive adrenergic drive in patients with heart failure results in an enhanced activation of GPCR  
86 kinases (GRKs) that is considered to have a central role in adverse cardiac remodeling after is-  
87 chemic injury. The selective Serotonin reuptake inhibitor paroxetine specifically binds to the catalyt-  
88 ic domain of GRK2 as an off-target effect, and has been shown to reverse cardiac remodeling and  
89 increase left ventricular ejection fraction in a mouse model. The effect was observed at serum lev-  
90 els achieved with standard dosages of paroxetine, and was robust in mice with and without con-  
91 comitant heart failure treatment, respectively.

92

93 **1.2 Objectives**

94

95 The objective of this study is to evaluate whether paroxetine-mediated GRK2 inhibition reverses cardi-  
96 ac dysfunction and remodeling after acute anterior wall ST-segment elevation myocardial infarction.

97 The primary objective is to evaluate whether paroxetine-mediated GRK-2 inhibition following myocar-  
98 dial infarction improves left ventricular ejection fraction over a course of 3 months as assessed by  
99 cardiac MRI (cMRI).

|          |                   |               |
|----------|-------------------|---------------|
| CTU Bern | SAP for: CARE-AMI | Version: v1.0 |
|----------|-------------------|---------------|

|          |                                           |                        |              |
|----------|-------------------------------------------|------------------------|--------------|
| CTU Bern | Template: Statistical Analysis Plan (SAP) | Version: 1             |              |
|          | Code: CS_STA_TEM-11                       | Valid from: 13.11.2020 | Page 5 of 27 |

100 **2. Study methods**

101 **2.1 Trial design**

102 This study is a prospective, randomized, placebo controlled, double-blinded, explorative single-  
103 center study.

104 A total of 50 patients presenting with acute myocardial infarction (<24 hours since symptom onset)  
105 for primary percutaneous coronary intervention will be randomized in a 1:1 ratio to treatment with  
106 paroxetine or placebo <7 days after primary PCI. Randomization will be performed by the use of  
107 sequentially numbered, sealed, opaque, tamper-proof security envelopes. Study participants will be  
108 blinded to the treatment allocation. Patients will be treated with paroxetine 20 mg QD or placebo  
109 QD for the duration of 12 weeks in addition to standard medical therapy for myocardial infarction  
110 (in particular including ACE-inhibitors/AT1-AT2-antagonists and beta-blocker therapy). LVEF will  
111 be assessed at baseline and at 12 weeks by the use of transthoracic echocardiography and cardi-  
112 ac MRI. Paroxetine serum levels will be measured at 12 weeks. In week 13, a paroxetine dose of  
113 10mg QD or placebo QD will be given to avoid abrupt discontinuation. Telephone follow-up will be  
114 performed at 1 month; clinical follow-up will be performed at 12 weeks, and at 12 months.

115 **2.2 Randomization**

116 Randomization will be performed after primary percutaneous coronary intervention has been per-  
117 formed, all eligibility criteria have been checked, and written informed consent has been obtained.  
118 The allocation schedule is based on computer-generated random numbers and randomization will  
119 be performed using REDCap software. Patients are assigned on a 1:1 basis to treatment with a  
120 paroxetine 20 mg q.d. for 12 weeks(week 1-12)/10mg q.d. for 1 week (week 13) or placebo q.d. for  
121 13 weeks, respectively.

122

123 **2.3 Sample size**

124 For each arm of the study the estimated number of participants will be 25. We assume a difference  
125 in delta LVEF of 10% in the treatment group compared to the control group with a standard devia-  
126 tion of 10% (increase of 5% in the control group and 15% in the treatment group) after 12 weeks.  
127 Dropout rate at 12 weeks was estimated to be 10% in both groups. We calculated a sample size of  
128 50 patients to provide more than 90% power to detect superiority on the primary endpoint at a two-  
129 sided type I error of 0.05.

130 The difference in delta LVEF of 10% was assumed aligning with the study results of Schumacher et  
131 al. in which they found even an absolute increase in LVEF of 30% after the intake of Paroxetin  
132 (14).

133

134 **2.4 Framework**

135 We formulate the following Null Hypothesis: “There is no difference in LVEF recovery between  
136 patients with acute ST-segment elevation myocardial infarction with or without administration of  
137 Paroxetine, respectively”. Our Alternative Hypothesis is thus as follows: “The administration of

|          |                   |               |
|----------|-------------------|---------------|
| CTU Bern | SAP for: CARE-AMI | Version: v1.0 |
|----------|-------------------|---------------|

|          |                                           |                        |              |
|----------|-------------------------------------------|------------------------|--------------|
| CTU Bern | Template: Statistical Analysis Plan (SAP) | Version: 1             |              |
|          | Code: CS_STA_TEM-11                       | Valid from: 13.11.2020 | Page 6 of 27 |

138 Paroxetine in patients with acute ST-segment elevation myocardial infarction increases LVEF by  
139 10% compared to the control group". Using this hypothesis we will be able to evaluate the off-  
140 target effect of Paroxetine on cardiac remodeling.

141 **2.5 Statistical interim analyses and stopping guidance**

142

143 No interim analyses are planned.

144 **2.6 Timing of final analysis**

145

146 Final analysis will be performed after all data have been entered into the REDCap database and  
147 locked.

148 **2.7 Timing of outcome assessments**

149

150 The primary and secondary outcomes are measured during the 12 week visit. All primary and second-  
151 ary outcomes will be analyzed collectively after study completion. After completion of data entry, data  
152 validation and cleaning will be performed. The investigators will receive first the analyses of all 50  
153 patients together to check for plausibility. If these analyses are deemed plausible and correct, the da-  
154 tabase will be locked.

155 **2.8 Blinding**

156

157 Placebo tablets specifically prepared for this trial will be identical to the real drug in color, appearance,  
158 smell and taste, as well as packaging and labeling. Trial participants, care providers, outcome assess-  
159 sors, and data analysts will be blinded to the assignment of treatment.

|          |                   |               |
|----------|-------------------|---------------|
| CTU Bern | SAP for: CARE-AMI | Version: v1.0 |
|----------|-------------------|---------------|

|          |                                           |                        |              |
|----------|-------------------------------------------|------------------------|--------------|
| CTU Bern | Template: Statistical Analysis Plan (SAP) | Version: 1             |              |
|          | Code: CS_STA_TEM-11                       | Valid from: 13.11.2020 | Page 7 of 27 |

160 **3. Data management**

161

162 **3.1 Data export**

163

164 Data from REDCap will be downloaded to Stata for statistical analysis. The data will be stored in  
165 REDCap for the duration of 10 years after completion of the study. MRI and echocardiographic  
166 data will be stored as usual in the clinical setting. Blood samples will be destroyed according to  
167 local standards.

168 **3.2 Data validation**

169

170 Before locking, the data will be checked for completeness using e.g. missing tables functions. The  
171 plausibility of the primary and secondary outcomes will be checked using outlier analyses and histo-  
172 gram, and will be queried if they are outside the expected range. The plausibility of IMP intake will be  
173 checked with the number of pills returned at the 12 week visit. The plausibility of the event dates will  
174 be checked compared to the date of randomization.

175 **3.3 Data preparation**

176

177 The primary and secondary outcomes are derived from the 12 weeks imaging (MRI and TTE) minus  
178 the baseline imaging (MRI and TTE) for the continuous variables.

179

180 **3.4 Data sharing**

181

182 The data will be shared anonymized according to our SOP anonymization on the BORIS portal.

183

184

185

|          |                   |               |
|----------|-------------------|---------------|
| CTU Bern | SAP for: CARE-AMI | Version: v1.0 |
|----------|-------------------|---------------|

|          |                                           |                        |              |
|----------|-------------------------------------------|------------------------|--------------|
| CTU Bern | Template: Statistical Analysis Plan (SAP) | Version: 1             |              |
|          | Code: CS_STA_TEM-11                       | Valid from: 13.11.2020 | Page 8 of 27 |



186 **4. Statistical principles**

187 **4.1 Confidence intervals and P values**

188

189 Continuous variables will be summarised by means and standard deviations (SD) for normally distrib-  
190 uted continuous variables or medians and interquartile ranges otherwise. Categorical variables will be  
191 summarised by frequencies and percentages. P-values will be computed using Chi-square or (in case  
192 of few events) Fisher's tests for categorical variables, Student's t-test for normally distributed continu-  
193 ous variables and Wilcoxon's Mann-Whitney U-test for non- symmetrically distributed continuous vari-  
194 ables.

195 The primary and secondary outcomes will be reported using mean differences and two-sided 95%  
196 confidence intervals with two-sided p-values.

197 The p-values will refer to differences across groups at patient-level, except if lesion characteristics are  
198 reported, in which case appropriate mixed models will be used to account for the nesting of lesions  
199 within patients. All tests will be two-sided and a p-value <0.05 will be considered statistically signifi-  
200 cant.

201

202 **4.2 Analysis populations**

203

204 This is an exploratory trial with an intention-to-treat analysis design for the primary outcome, with no  
205 adjustment for covariates.

206 **4.2.1 Full analysis set (FAS)**

207

208 The full analysis set (FAS) will include all randomized subjects, which have the assessment of the  
209 respective outcome at both baseline and 12 weeks. Following the intent-to-treat principle, subjects will  
210 be analyzed according to the treatment they are assigned to at randomization.

211 **4.2.2 Per-protocol (PP)**

212

213 The PP set (PP) will include all randomized subjects, which have the assessment of the respective  
214 outcome at both baseline and 12 weeks; but excluding from the PP population patients who had the  
215 following major protocol deviations:

- 216 1. Breached one of the inclusion or exclusion criteria.
- 217 2. IMP was not started at all, or returned more than 20% of the 84 full-dosage IMP pills.

218 **4.2.3 Safety population**

219

|          |                   |               |
|----------|-------------------|---------------|
| CTU Bern | SAP for: CARE-AMI | Version: v1.0 |
|----------|-------------------|---------------|

|          |                                           |                        |              |
|----------|-------------------------------------------|------------------------|--------------|
| CTU Bern | Template: Statistical Analysis Plan (SAP) | Version: 1             | Page 9 of 27 |
|          | Code: CS_STA_TEM-11                       | Valid from: 13.11.2020 |              |

220 The safety population consists of all subjects in the FAS who took at least one dose of study medica-  
221 tion. Subjects will be analyzed according to the treatment actually taken, paroxetine or placebo.

222 **4.3 Estimands**

223

224 The primary and secondary outcomes will be reported using the mean differences of the change in  
225 value (week 12 minus baseline) comparing paroxetine vs placebo arm; with 95% confidence intervals  
226 and p-values (two-sided). The patient set will be the ITT FAS population with the value assessed by  
227 MRI (or TTE for some secondary outcomes) at both baseline and 12 weeks.

228 If there are more than 10% missing data (estimated lost-to-follow-up), then additional sensitivity anal-  
229 yses of the primary and secondary outcomes will be performed using multiple imputation with the  
230 chained equations methodology (using baseline risk factors to impute), creating 50 data-sets; and the  
231 mean differences of the change in value (week 12 minus baseline) comparing paroxetine vs placebo  
232 arm; with 95% confidence intervals and p-values will be computed from these 50 data-sets using Ru-  
233 bin's rule.

234

|          |                   |               |
|----------|-------------------|---------------|
| CTU Bern | SAP for: CARE-AMI | Version: v1.0 |
|----------|-------------------|---------------|

|          |                                           |                        |               |
|----------|-------------------------------------------|------------------------|---------------|
| CTU Bern | Template: Statistical Analysis Plan (SAP) | Version: 1             |               |
|          | Code: CS_STA_TEM-11                       | Valid from: 13.11.2020 | Page 10 of 27 |

235 **5. Trial Population**

236 **5.1 Screening data**

237

238 A screening log of STEMI patients will be presented, with the number of patients excluded because of:

239 1. LVEF >45% (visual or MRI estimate).

240 2. refused consent.

241 3. already taking antidepressants.

242 4. included in different cardiovascular trial.

243

244 **5.2 Eligibility**

245 Participants fulfilling all of the following inclusion criteria are eligible for the study:

246 - Acute anterior wall ST-segment elevation myocardial infarction

247 - Informed Consent as documented by signature (Appendix Informed Consent Form)

248 - Age ≥18 years

249 - Primary PCI within 24 hours of symptom onset

250 - LVEF ≤ 45% within 48-96h after primary PCI (TTE)

251

252 The presence of any one of the following exclusion criteria will lead to exclusion of the participant:

253 • Contraindications to the SSRIs, e.g. known hypersensitivity or allergy to class of drugs or the investi-  
254 gational product

255 • Intolerance to Paroxetine

256 • Current medical therapy with MAO-blocker (during, 14 days before, and 14 days after treatment with  
257 MAO-blocker), lithium, thioridazide, or pimozide,

258 • Women at reproductive age (<50 years)

259 • Significant renal failure, hepatic dysfunction

260 • Known or suspected non-compliance, drug or alcohol abuse,

261 • Inability to follow the procedures of the study, e.g. due to language problems, psychological disor-  
262 ders, dementia, etc. of the participant,

263 • Participation in another study with paroxetine within the 30 days preceding and during the present  
264 study,

265 • Previous enrolment into the current study,

266 • Enrolment of the investigator, his/her family members, employees and other dependent persons,

267 • Current Paroxetine treatment

268 • Previous myocardial infarction

269 • Previous revascularization procedure (percutaneous coronary intervention or coronary artery bypass  
270 grafting).

271 • Contraindications to CMR (metallic foreign bodies)

272 • Cardiac MRI

273

|          |                   |               |
|----------|-------------------|---------------|
| CTU Bern | SAP for: CARE-AMI | Version: v1.0 |
|----------|-------------------|---------------|

|          |                                           |                        |
|----------|-------------------------------------------|------------------------|
| CTU Bern | Template: Statistical Analysis Plan (SAP) | Version: 1             |
|          | Code: CS_STA_TEM-11                       | Valid from: 13.11.2020 |

274 **5.3 Baseline characteristics**

275

276 A Table of baseline clinical and risk factors will be produced.

**Table 1. Baseline Clinical Characteristics**

|                                                            | Paroxetine | Placebo    |
|------------------------------------------------------------|------------|------------|
|                                                            | (N=)       | (N=)       |
| <b>Demographics</b>                                        |            |            |
| Age — years (SD)                                           | xx.x ± x.x | xx.x ± x.x |
| Male gender — no. (%)                                      | x (x.x%)   | x (x.x%)   |
| <b>Medical history</b>                                     |            |            |
| Family history of CAD — no. (%)                            | x (x.x%)   | x (x.x%)   |
| Peripheral arterial disease — no. (%)                      | x (x.x%)   | x (x.x%)   |
| Diabetes mellitus — no. (%)                                | x (x.x%)   | x (x.x%)   |
| Current smoker — no. (%)                                   | x (x.x%)   | x (x.x%)   |
| Hypertension* — no. (%)                                    | x (x.x%)   | x (x.x%)   |
| Hypercholesterolemia — no. (%)                             | x (x.x%)   | x (x.x%)   |
| Previous MI — no. (%)                                      | x (x.x%)   | x (x.x%)   |
| Previous PCI — no. (%)                                     | x (x.x%)   | x (x.x%)   |
| Previous CABG — no. (%)                                    | x (x.x%)   | x (x.x%)   |
| Renal insufficiency requiring dialysis — no. (%)           | x (x.x%)   | x (x.x%)   |
| History of malignancy — no. (%)                            | x (x.x%)   | x (x.x%)   |
| Chronic obstructive lung disease — no. (%)                 | x (x.x%)   | x (x.x%)   |
| History of Cerebrovascular Accident (stroke/TIA) — no. (%) | x (x.x%)   | x (x.x%)   |
| History of atrial fibrillation/flutter — no. (%)           | x (x.x%)   | x (x.x%)   |
| History of intracranial bleeding — no. (%)                 | x (x.x%)   | x (x.x%)   |
| History of systemic inflammatory disease — no. (%)         | x (x.x%)   | x (x.x%)   |
| Pacemaker — no. (%)                                        | x (x.x%)   | x (x.x%)   |
| ICD — no. (%)                                              | x (x.x%)   | x (x.x%)   |
| CRT — no. (%)                                              | x (x.x%)   | x (x.x%)   |

Data expressed as n (%) or means ± standard deviations.

TIA: transient ischemic attack; ICD: implanted cardioverter defibrillator; CRT: cardiac resynchronisation device

277 \*blood pressure &gt;140/90 in 3 repetitive measurements in flat position or requiring treatment

278

|          |                                           |                        |               |
|----------|-------------------------------------------|------------------------|---------------|
| CTU Bern | SAP for: CARE-AMI                         | Version: v1.0          |               |
| CTU Bern | Template: Statistical Analysis Plan (SAP) | Version: 1             |               |
|          | Code: CS_STA_TEM-11                       | Valid from: 13.11.2020 | Page 12 of 27 |

279 **5.4 Angiographic and Procedural characteristics**

280

 281 A Table of angiographic and procedural PCI details will be produced, with the mean difference  
 282 comparing paroxetine vs placebo.

**Table 2. Angiographic and Index Procedural Characteristics**

| Nr of patients                                                          | Paroxetine<br>(N=) | Placebo<br>(N=)    |
|-------------------------------------------------------------------------|--------------------|--------------------|
| Killip III or IV — no.                                                  | x (x.x%)           | x (x.x%)           |
| LVEF by ventriculography — % (SD)                                       | n = xx, xx.x ± x.x | n = xx, xx.x ± x.x |
| Time between symptom onset and first ballooning/stenting — minutes (SD) | n = xx, xx.x ± x.x | n = xx, xx.x ± x.x |
| Total contrast — ml (SD)                                                | n = xx, xx.x ± x.x | n = xx, xx.x ± x.x |
| Hemodynamic support — no. (%)                                           | x (x.x%)           | x (x.x%)           |
| IABP                                                                    | x (x.x%)           | x (x.x%)           |
| Impella                                                                 | x (x.x%)           | x (x.x%)           |
| ECMO                                                                    | x (x.x%)           | x (x.x%)           |
| Vasopressors                                                            | x (x.x%)           | x (x.x%)           |
| Any evidence of thrombus — no. (%)                                      | x (x.x%)           | x (x.x%)           |
| Any thrombus aspiration — no. (%)                                       | x (x.x%)           | x (x.x%)           |
| <b>Details on coronaries — no. (%)</b>                                  |                    |                    |
| Left main artery LM                                                     | n = xx ,           | n = xx ,           |
| Significant lesion                                                      | x (x.x%)           | x (x.x%)           |
| Target lesion                                                           | x (x.x%)           | x (x.x%)           |
| Treated with PCI                                                        | x (x.x%)           | x (x.x%)           |
| PTCA                                                                    | x (x.x%)           | x (x.x%)           |
| Drug-eluting stent DES                                                  | x (x.x%)           | x (x.x%)           |
| Left circumflex LCX                                                     | n = xx ,           | n = xx ,           |
| Significant lesion                                                      | x (x.x%)           | x (x.x%)           |
| Target lesion                                                           | x (x.x%)           | x (x.x%)           |
| Treated with PCI                                                        | x (x.x%)           | x (x.x%)           |
| PTCA                                                                    | x (x.x%)           | x (x.x%)           |
| Drug-eluting stent DES                                                  | x (x.x%)           | x (x.x%)           |
| 1st Marginal Branch                                                     | n = xx ,           | n = xx ,           |
| Significant lesion                                                      | x (x.x%)           | x (x.x%)           |
| Target lesion                                                           | x (x.x%)           | x (x.x%)           |
| Treated with PCI                                                        | x (x.x%)           | x (x.x%)           |

|                 |                   |               |
|-----------------|-------------------|---------------|
| <b>CTU Bern</b> | SAP for: CARE-AMI | Version: v1.0 |
|-----------------|-------------------|---------------|

|                 |                                           |                        |               |
|-----------------|-------------------------------------------|------------------------|---------------|
| <b>CTU Bern</b> | Template: Statistical Analysis Plan (SAP) | Version: 1             |               |
|                 | Code: CS_STA_TEM-11                       | Valid from: 13.11.2020 | Page 13 of 27 |

|                                          |          |          |
|------------------------------------------|----------|----------|
| PTCA                                     | x (x.x%) | x (x.x%) |
| Drug-eluting stent DES                   | x (x.x%) | x (x.x%) |
| 2nd Marginal Branch                      | n = xx , | n = xx , |
| Significant lesion                       | x (x.x%) | x (x.x%) |
| Target lesion                            | x (x.x%) | x (x.x%) |
| Treated with PCI                         | x (x.x%) | x (x.x%) |
| PTCA                                     | x (x.x%) | x (x.x%) |
| Drug-eluting stent DES                   | x (x.x%) | x (x.x%) |
| Left ascending artery LAD                | n = xx , | n = xx , |
| Significant lesion                       | x (x.x%) | x (x.x%) |
| Target lesion                            | x (x.x%) | x (x.x%) |
| Treated with PCI                         | x (x.x%) | x (x.x%) |
| PTCA                                     | x (x.x%) | x (x.x%) |
| Drug-eluting stent DES                   | x (x.x%) | x (x.x%) |
| 1st Diagonal Branch                      | n = xx , | n = xx , |
| Significant lesion                       | x (x.x%) | x (x.x%) |
| Target lesion                            | x (x.x%) | x (x.x%) |
| Treated with PCI                         | x (x.x%) | x (x.x%) |
| PTCA                                     | x (x.x%) | x (x.x%) |
| Drug-eluting stent DES                   | x (x.x%) | x (x.x%) |
| 2nd Diagonal Branch                      | n = xx , | n = xx , |
| Significant lesion                       | x (x.x%) | x (x.x%) |
| Target lesion                            | x (x.x%) | x (x.x%) |
| Treated with PCI                         | x (x.x%) | x (x.x%) |
| PTCA                                     | x (x.x%) | x (x.x%) |
| Drug-eluting stent DES                   | x (x.x%) | x (x.x%) |
| Ramus intermedius RIM                    | n = xx , | n = xx , |
| Significant lesion                       | x (x.x%) | x (x.x%) |
| Target lesion                            | x (x.x%) | x (x.x%) |
| Treated with PCI                         | x (x.x%) | x (x.x%) |
| PTCA                                     | x (x.x%) | x (x.x%) |
| Drug-eluting stent DES                   | x (x.x%) | x (x.x%) |
| Right coronary artery RCA                | n = xx , | n = xx , |
| Significant lesion                       | x (x.x%) | x (x.x%) |
| Target lesion                            | x (x.x%) | x (x.x%) |
| Treated with PCI                         | x (x.x%) | x (x.x%) |
| PTCA                                     | x (x.x%) | x (x.x%) |
| Drug-eluting stent DES                   | x (x.x%) | x (x.x%) |
| Ramus interventricularis posterior RIVPO |          |          |

|          |                   |               |
|----------|-------------------|---------------|
| CTU Bern | SAP for: CARE-AMI | Version: v1.0 |
|----------|-------------------|---------------|

|          |                                           |                        |               |
|----------|-------------------------------------------|------------------------|---------------|
| CTU Bern | Template: Statistical Analysis Plan (SAP) | Version: 1             |               |
|          | Code: CS_STA_TEM-11                       | Valid from: 13.11.2020 | Page 14 of 27 |

|                                                                              |          |          |
|------------------------------------------------------------------------------|----------|----------|
| Significant lesion                                                           | x (x.x%) | x (x.x%) |
| Target lesion                                                                | x (x.x%) | x (x.x%) |
| Treated with PCI                                                             | x (x.x%) | x (x.x%) |
| PTCA                                                                         | x (x.x%) | x (x.x%) |
| Drug-eluting stent                                                           | x (x.x%) | x (x.x%) |
| Posterolateral artery PLA                                                    |          |          |
| Significant lesion                                                           | x (x.x%) | x (x.x%) |
| Target lesion                                                                | x (x.x%) | x (x.x%) |
| Treated with PCI                                                             | x (x.x%) | x (x.x%) |
| PTCA                                                                         | x (x.x%) | x (x.x%) |
| Drug-eluting stent                                                           | x (x.x%) | x (x.x%) |
| Nr of DES implanted in target lesion                                         |          |          |
| 1                                                                            | x (x.x%) | x (x.x%) |
| 2                                                                            | x (x.x%) | x (x.x%) |
| 3 or more                                                                    | x (x.x%) | x (x.x%) |
| <b>Procedural medications (within 24h and up to end procedure) — no. (%)</b> |          |          |
| Loading with aspirin                                                         | x (x.x%) | x (x.x%) |
| Loading with clopidogrel                                                     | x (x.x%) | x (x.x%) |
| Loading with ticagrelor                                                      | x (x.x%) | x (x.x%) |
| Loading with prasugrel                                                       | x (x.x%) | x (x.x%) |
| Unfractionated heparin                                                       | x (x.x%) | x (x.x%) |
| Bivalirudin                                                                  | x (x.x%) | x (x.x%) |
| GP IIb/IIIa                                                                  | x (x.x%) | x (x.x%) |

Data expressed as n (%) or means±standard deviations.

IABP: intra-aortic balloon pump; ECMO: extracorporeal membrane oxygenation; PTCA: percutaneous transluminal coronary angioplasty.

283

284

|          |                                           |                        |               |
|----------|-------------------------------------------|------------------------|---------------|
| CTU Bern | SAP for: CARE-AMI                         | Version: v1.0          |               |
| CTU Bern | Template: Statistical Analysis Plan (SAP) | Version: 1             |               |
|          | Code: CS_STA_TEM-11                       | Valid from: 13.11.2020 | Page 15 of 27 |

285 **5.5 Medication**

286

 287 A Table of medications at each visit will be produced, with the mean difference comparing paroxe-  
 288 tine vs placebo.

**Table 3. Medication use**

|                                                    | Paroxetine<br>(N=) | Placebo<br>(N=) | p-value |
|----------------------------------------------------|--------------------|-----------------|---------|
| <b>Baseline — no. (%)</b>                          |                    |                 |         |
| Aspirin                                            | x (x.x%)           | x (x.x%)        |         |
| Clopidogrel                                        | x (x.x%)           | x (x.x%)        |         |
| Prasugrel                                          | x (x.x%)           | x (x.x%)        |         |
| Ticagrelor                                         | x (x.x%)           | x (x.x%)        |         |
| Marcoumar or Warfarin                              | x (x.x%)           | x (x.x%)        |         |
| NOAC                                               | x (x.x%)           | x (x.x%)        |         |
| Dabigatran                                         | x (x.x%)           | x (x.x%)        |         |
| Rivaroxaban                                        | x (x.x%)           | x (x.x%)        |         |
| Apixaban                                           | x (x.x%)           | x (x.x%)        |         |
| Statin                                             | x (x.x%)           | x (x.x%)        |         |
| Other lipid lowering drug                          | x (x.x%)           | x (x.x%)        |         |
| ACE inhibitor                                      | x (x.x%)           | x (x.x%)        |         |
| ATII antagonist                                    | x (x.x%)           | x (x.x%)        |         |
| Betablocker                                        | x (x.x%)           | x (x.x%)        |         |
| Ca-antagonist                                      | x (x.x%)           | x (x.x%)        |         |
| Amiodarone                                         | x (x.x%)           | x (x.x%)        |         |
| Digoxin                                            | x (x.x%)           | x (x.x%)        |         |
| Nitrates                                           | x (x.x%)           | x (x.x%)        |         |
| Diuretics                                          | x (x.x%)           | x (x.x%)        |         |
| Insulin                                            | x (x.x%)           | x (x.x%)        |         |
| Oral antidiabetic                                  | x (x.x%)           | x (x.x%)        |         |
| NSAID (Non Steroidal Anti Inflammato-<br>ry Drugs) | x (x.x%)           | x (x.x%)        |         |
| PPI                                                | x (x.x%)           | x (x.x%)        |         |
| Antidepressant drug                                | x (x.x%)           | x (x.x%)        |         |

|          |                   |               |
|----------|-------------------|---------------|
| CTU Bern | SAP for: CARE-AMI | Version: v1.0 |
|----------|-------------------|---------------|

|          |                                           |                        |               |
|----------|-------------------------------------------|------------------------|---------------|
| CTU Bern | Template: Statistical Analysis Plan (SAP) | Version: 1             |               |
|          | Code: CS_STA_TEM-11                       | Valid from: 13.11.2020 | Page 16 of 27 |



|                                                  |          |          |      |
|--------------------------------------------------|----------|----------|------|
| Antiarrhythmic (other than B-Blocker/Amiodarone) | x (x.x%) | x (x.x%) |      |
| <b>Discharge — no. (%)</b>                       |          |          |      |
| Aspirin                                          | x (x.x%) | x (x.x%) | x.xx |
| Clopidogrel                                      | x (x.x%) | x (x.x%) | x.xx |
| Prasugrel                                        | x (x.x%) | x (x.x%) | x.xx |
| Ticagrelor                                       | x (x.x%) | x (x.x%) | x.xx |
| Marcoumar or Warfarin                            | x (x.x%) | x (x.x%) | x.xx |
| NOAC                                             | x (x.x%) | x (x.x%) | x.xx |
| Dabigatran                                       | x (x.x%) | x (x.x%) | x.xx |
| Rivaroxaban                                      | x (x.x%) | x (x.x%) | x.xx |
| Apixaban                                         | x (x.x%) | x (x.x%) | x.xx |
| Statin                                           | x (x.x%) | x (x.x%) | x.xx |
| Other lipid lowering drug                        | x (x.x%) | x (x.x%) | x.xx |
| ACE inhibitor                                    | x (x.x%) | x (x.x%) | x.xx |
| ATII antagonist                                  | x (x.x%) | x (x.x%) | x.xx |
| Betablocker                                      | x (x.x%) | x (x.x%) | x.xx |
| Ca-antagonist                                    | x (x.x%) | x (x.x%) | x.xx |
| Amiodarone                                       | x (x.x%) | x (x.x%) | x.xx |
| Digoxin                                          | x (x.x%) | x (x.x%) | x.xx |
| Nitrates                                         | x (x.x%) | x (x.x%) | x.xx |
| Diuretics                                        | x (x.x%) | x (x.x%) | x.xx |
| Insulin                                          | x (x.x%) | x (x.x%) | x.xx |
| Oral antidiabetic                                | x (x.x%) | x (x.x%) | x.xx |
| NSAID (Non Steroidal Anti Inflammatory Drugs)    | x (x.x%) | x (x.x%) | x.xx |
| PPI                                              | x (x.x%) | x (x.x%) | x.xx |
| Antidepressant drug                              | x (x.x%) | x (x.x%) | x.xx |
| Antiarrhythmic (other than B-Blocker/Amiodarone) | x (x.x%) | x (x.x%) | x.xx |
| <b>Week 4 — no. (%)</b>                          |          |          |      |
| Aspirin                                          | x (x.x%) | x (x.x%) | x.xx |
| Clopidogrel                                      | x (x.x%) | x (x.x%) | x.xx |
| Prasugrel                                        | x (x.x%) | x (x.x%) | x.xx |
| Ticagrelor                                       | x (x.x%) | x (x.x%) | x.xx |
| Marcoumar or Warfarin                            | x (x.x%) | x (x.x%) | x.xx |

|          |                   |               |
|----------|-------------------|---------------|
| CTU Bern | SAP for: CARE-AMI | Version: v1.0 |
|----------|-------------------|---------------|

|          |                                           |                        |               |
|----------|-------------------------------------------|------------------------|---------------|
| CTU Bern | Template: Statistical Analysis Plan (SAP) | Version: 1             |               |
|          | Code: CS_STA_TEM-11                       | Valid from: 13.11.2020 | Page 17 of 27 |

|                                                  |          |          |      |
|--------------------------------------------------|----------|----------|------|
| NOAC                                             | x (x.x%) | x (x.x%) | x.xx |
| Dabigatran                                       | x (x.x%) | x (x.x%) | x.xx |
| Rivaroxaban                                      | x (x.x%) | x (x.x%) | x.xx |
| Apixaban                                         | x (x.x%) | x (x.x%) | x.xx |
| Statin                                           | x (x.x%) | x (x.x%) | x.xx |
| Other lipid lowering drug                        | x (x.x%) | x (x.x%) | x.xx |
| ACE inhibitor                                    | x (x.x%) | x (x.x%) | x.xx |
| ATII antagonist                                  | x (x.x%) | x (x.x%) | x.xx |
| Betablocker                                      | x (x.x%) | x (x.x%) | x.xx |
| Ca-antagonist                                    | x (x.x%) | x (x.x%) | x.xx |
| Amiodarone                                       | x (x.x%) | x (x.x%) | x.xx |
| Digoxin                                          | x (x.x%) | x (x.x%) | x.xx |
| Nitrates                                         | x (x.x%) | x (x.x%) | x.xx |
| Diuretics                                        | x (x.x%) | x (x.x%) | x.xx |
| Insulin                                          | x (x.x%) | x (x.x%) | x.xx |
| Oral antidiabetic                                | x (x.x%) | x (x.x%) | x.xx |
| NSAID (Non Steroidal Anti Inflammatory Drugs)    | x (x.x%) | x (x.x%) | x.xx |
| PPI                                              | x (x.x%) | x (x.x%) | x.xx |
| Antidepressant drug                              | x (x.x%) | x (x.x%) | x.xx |
| Antiarrhythmic (other than B-Blocker/Amiodarone) | x (x.x%) | x (x.x%) | x.xx |
| <b>Week 12 — no. (%)</b>                         |          |          |      |
| Aspirin                                          | x (x.x%) | x (x.x%) | x.xx |
| Clopidogrel                                      | x (x.x%) | x (x.x%) | x.xx |
| Prasugrel                                        | x (x.x%) | x (x.x%) | x.xx |
| Ticagrelor                                       | x (x.x%) | x (x.x%) | x.xx |
| Marcoumar or Warfarin                            | x (x.x%) | x (x.x%) | x.xx |
| NOAC                                             | x (x.x%) | x (x.x%) | x.xx |
| Dabigatran                                       | x (x.x%) | x (x.x%) | x.xx |
| Rivaroxaban                                      | x (x.x%) | x (x.x%) | x.xx |
| Apixaban                                         | x (x.x%) | x (x.x%) | x.xx |
| Statin                                           | x (x.x%) | x (x.x%) | x.xx |
| Other lipid lowering drug                        | x (x.x%) | x (x.x%) | x.xx |
| ACE inhibitor                                    | x (x.x%) | x (x.x%) | x.xx |
| ATII antagonist                                  | x (x.x%) | x (x.x%) | x.xx |

|                 |                   |               |
|-----------------|-------------------|---------------|
| <b>CTU Bern</b> | SAP for: CARE-AMI | Version: v1.0 |
|-----------------|-------------------|---------------|

|                 |                                           |                        |               |
|-----------------|-------------------------------------------|------------------------|---------------|
| <b>CTU Bern</b> | Template: Statistical Analysis Plan (SAP) | Version: 1             |               |
|                 | Code: CS_STA_TEM-11                       | Valid from: 13.11.2020 | Page 18 of 27 |

|                                                  |          |          |      |
|--------------------------------------------------|----------|----------|------|
| Betablocker                                      | x (x.x%) | x (x.x%) | x.xx |
| Ca-antagonist                                    | x (x.x%) | x (x.x%) | x.xx |
| Amiodarone                                       | x (x.x%) | x (x.x%) | x.xx |
| Digoxin                                          | x (x.x%) | x (x.x%) | x.xx |
| Nitrates                                         | x (x.x%) | x (x.x%) | x.xx |
| Diuretics                                        | x (x.x%) | x (x.x%) | x.xx |
| Insulin                                          | x (x.x%) | x (x.x%) | x.xx |
| Oral antidiabetic                                | x (x.x%) | x (x.x%) | x.xx |
| NSAID (Non Steroidal Anti Inflammatory Drugs)    | x (x.x%) | x (x.x%) | x.xx |
| PPI                                              | x (x.x%) | x (x.x%) | x.xx |
| Antidepressant drug                              | x (x.x%) | x (x.x%) | x.xx |
| Antiarrhythmic (other than B-Blocker/Amiodarone) | x (x.x%) | x (x.x%) | x.xx |

Data expressed as n (%) and p-values are from Fisher's tests.

289  
290

|                 |                   |               |  |
|-----------------|-------------------|---------------|--|
| <b>CTU Bern</b> | SAP for: CARE-AMI | Version: v1.0 |  |
|-----------------|-------------------|---------------|--|

|                 |                                           |                        |               |
|-----------------|-------------------------------------------|------------------------|---------------|
| <b>CTU Bern</b> | Template: Statistical Analysis Plan (SAP) | Version: 1             |               |
|                 | Code: CS_STA_TEM-11                       | Valid from: 13.11.2020 | Page 19 of 27 |

291 **5.6 Adherence**

292

 293 A Table of regular intake of IMPs up to Week 4, and from Week 4 to Week 12 will be reported, with  
 294 details and potential side-effects of the IMPs.

295

 296 At Week 12 descriptive statistics will be provided of how many pills out of the 84 pills (12 weeks x 7  
 297 pills) were returned (% of total provided), single listing if only a few missed can be reported also inside  
 298 the flowchart. Serum paroxetine levels above or equal to the lower detection threshold of the assay (6  
 299 ng/ml) will be provided, together with actual mean levels (with standard deviation) comparing paroxe-  
 300 tine vs placebo, if paroxetine was detected. Mean differences comparing paroxetine vs placebo will be  
 301 provided.

302

**Table 4. Adherence to IMP intake**

|                                                    | Paroxetine<br>(N=xx) | Placebo<br>(N=xx)  | p-value |
|----------------------------------------------------|----------------------|--------------------|---------|
| <b>At Baseline</b>                                 |                      |                    |         |
| IMP distributed to patient?                        | x (x.x%)             | x (x.x%)           | x.xx    |
| If not, specify                                    |                      |                    |         |
| <b>At Week 4</b>                                   |                      |                    |         |
| Regular intake of IMP                              | x (x.x%)             | x (x.x%)           | x.xx    |
| If not, specify                                    |                      |                    |         |
| Side-effects of IMP                                | x (x.x%)             | x (x.x%)           | x.xx    |
| Patient continues study and IMP intake             | x (x.x%)             | x (x.x%)           | x.xx    |
| <b>At Week 12</b>                                  |                      |                    |         |
| Regular intake of IMP — no. (%)                    | x (x.x%)             | x (x.x%)           | x.xx    |
| If not, specify                                    |                      |                    |         |
| Side-effects of IMP — no. (%)                      | x (x.x%)             | x (x.x%)           | x.xx    |
| Percentage of IMP pills returned unused* — no. (%) | x (x.x%)             | x (x.x%)           | x.xx    |
| Number of IMP pills returned* — no.                | x, x, x              | x, x, x            |         |
| Serum paroxetine ≥6ng/ml** — no. (%)               | x (x.x%)             | x (x.x%)           | x.xx    |
| Serum paroxetine if ≥6ng/ml — ng/ml (SD)           | n = xx, xx.x ± x.x   | n = xx, xx.x ± x.x | x.xx    |

Data expressed as n (%), p-value from Fisher's tests) or means±standard deviations (p-value from unpaired t-tests).

\*Patients received 12 weeks x 7 IMP pills (which contained either paroxetine or placebo), equals 84 pills in total.

\*\*Detection threshold of paroxetine assay.

303

304

|          |                   |               |
|----------|-------------------|---------------|
| CTU Bern | SAP for: CARE-AMI | Version: v1.0 |
|----------|-------------------|---------------|

|          |                                           |                        |               |
|----------|-------------------------------------------|------------------------|---------------|
| CTU Bern | Template: Statistical Analysis Plan (SAP) | Version: 1             |               |
|          | Code: CS_STA_TEM-11                       | Valid from: 13.11.2020 | Page 20 of 27 |

305 **5.7 Magnetic resonance imaging MRI**

306

307 A Table of variables (which includes the primary outcome and some secondary outcomes) measured  
308 using CT MRI will be produced, measured at baseline and Week 12; and the change from baseline to  
309 Week 12; with the difference in mean change comparing paroxetine vs placebo.

Table 5. MRI assessments

|                                              | Paroxetine         |                   |                                  |         | Placebo            |                   |                                  |         | Paroxetine vs Placebo            |         |
|----------------------------------------------|--------------------|-------------------|----------------------------------|---------|--------------------|-------------------|----------------------------------|---------|----------------------------------|---------|
|                                              | Baseline<br>(N=xx) | Week 12<br>(N=xx) | Change<br>Week 12 vs<br>Baseline | p-value | Baseline<br>(N=xx) | Week 12<br>(N=xx) | Change<br>Week 12 vs<br>Baseline | p-value | Mean difference<br>of the change | p-value |
| <b>Left ventricle — means (SD)</b>           |                    |                   |                                  |         |                    |                   |                                  |         |                                  |         |
| IVSD                                         | xx.x ± x.x         | xx.x ± x.x        | xx.x ± x.x                       | x.xx    | xx.x ± x.x         | xx.x ± x.x        | xx.x ± x.x                       | x.xx    | x.xx (x.xx to x.xx)              | x.xx    |
| IVSS                                         | xx.x ± x.x         | xx.x ± x.x        | xx.x ± x.x                       | x.xx    | xx.x ± x.x         | xx.x ± x.x        | xx.x ± x.x                       | x.xx    | x.xx (x.xx to x.xx)              | x.xx    |
| LVEDD                                        | xx.x ± x.x         | xx.x ± x.x        | xx.x ± x.x                       | x.xx    | xx.x ± x.x         | xx.x ± x.x        | xx.x ± x.x                       | x.xx    | x.xx (x.xx to x.xx)              | x.xx    |
| LVESD                                        | xx.x ± x.x         | xx.x ± x.x        | xx.x ± x.x                       | x.xx    | xx.x ± x.x         | xx.x ± x.x        | xx.x ± x.x                       | x.xx    | x.xx (x.xx to x.xx)              | x.xx    |
| PWD                                          | xx.x ± x.x         | xx.x ± x.x        | xx.x ± x.x                       | x.xx    | xx.x ± x.x         | xx.x ± x.x        | xx.x ± x.x                       | x.xx    | x.xx (x.xx to x.xx)              | x.xx    |
| PWS                                          | xx.x ± x.x         | xx.x ± x.x        | xx.x ± x.x                       | x.xx    | xx.x ± x.x         | xx.x ± x.x        | xx.x ± x.x                       | x.xx    | x.xx (x.xx to x.xx)              | x.xx    |
| LVEDV                                        | xx.x ± x.x         | xx.x ± x.x        | xx.x ± x.x                       | x.xx    | xx.x ± x.x         | xx.x ± x.x        | xx.x ± x.x                       | x.xx    | x.xx (x.xx to x.xx)              | x.xx    |
| LVEDV index                                  | xx.x ± x.x         | xx.x ± x.x        | xx.x ± x.x                       | x.xx    | xx.x ± x.x         | xx.x ± x.x        | xx.x ± x.x                       | x.xx    | x.xx (x.xx to x.xx)              | x.xx    |
| LVESV                                        | xx.x ± x.x         | xx.x ± x.x        | xx.x ± x.x                       | x.xx    | xx.x ± x.x         | xx.x ± x.x        | xx.x ± x.x                       | x.xx    | x.xx (x.xx to x.xx)              | x.xx    |
| LVESV index                                  | xx.x ± x.x         | xx.x ± x.x        | xx.x ± x.x                       | x.xx    | xx.x ± x.x         | xx.x ± x.x        | xx.x ± x.x                       | x.xx    | x.xx (x.xx to x.xx)              | x.xx    |
| LVSV                                         | xx.x ± x.x         | xx.x ± x.x        | xx.x ± x.x                       | x.xx    | xx.x ± x.x         | xx.x ± x.x        | xx.x ± x.x                       | x.xx    | x.xx (x.xx to x.xx)              | x.xx    |
| LVSV index                                   | xx.x ± x.x         | xx.x ± x.x        | xx.x ± x.x                       | x.xx    | xx.x ± x.x         | xx.x ± x.x        | xx.x ± x.x                       | x.xx    | x.xx (x.xx to x.xx)              | x.xx    |
| LV mass                                      | xx.x ± x.x         | xx.x ± x.x        | xx.x ± x.x                       | x.xx    | xx.x ± x.x         | xx.x ± x.x        | xx.x ± x.x                       | x.xx    | x.xx (x.xx to x.xx)              | x.xx    |
| LV mass index                                | xx.x ± x.x         | xx.x ± x.x        | xx.x ± x.x                       | x.xx    | xx.x ± x.x         | xx.x ± x.x        | xx.x ± x.x                       | x.xx    | x.xx (x.xx to x.xx)              | x.xx    |
| LV CO                                        | xx.x ± x.x         | xx.x ± x.x        | xx.x ± x.x                       | x.xx    | xx.x ± x.x         | xx.x ± x.x        | xx.x ± x.x                       | x.xx    | x.xx (x.xx to x.xx)              | x.xx    |
| LV CO index                                  | xx.x ± x.x         | xx.x ± x.x        | xx.x ± x.x                       | x.xx    | xx.x ± x.x         | xx.x ± x.x        | xx.x ± x.x                       | x.xx    | x.xx (x.xx to x.xx)              | x.xx    |
| Late enhancement                             | xx.x ± x.x         | xx.x ± x.x        | xx.x ± x.x                       | x.xx    | xx.x ± x.x         | xx.x ± x.x        | xx.x ± x.x                       | x.xx    | x.xx (x.xx to x.xx)              | x.xx    |
| LVEF - left ventricle ejection fraction — %* | xx.x ± x.x         | xx.x ± x.x        | xx.x ± x.x                       | x.xx    | xx.x ± x.x         | xx.x ± x.x        | xx.x ± x.x                       | x.xx    | x.xx (x.xx to x.xx)              | x.xx    |
| <b>Right ventricle — means (SD)</b>          |                    |                   |                                  |         |                    |                   |                                  |         |                                  |         |
| RVEDV                                        | xx.x ± x.x         | xx.x ± x.x        | xx.x ± x.x                       | x.xx    | xx.x ± x.x         | xx.x ± x.x        | xx.x ± x.x                       | x.xx    | x.xx (x.xx to x.xx)              | x.xx    |
| RVEDV index                                  | xx.x ± x.x         | xx.x ± x.x        | xx.x ± x.x                       | x.xx    | xx.x ± x.x         | xx.x ± x.x        | xx.x ± x.x                       | x.xx    | x.xx (x.xx to x.xx)              | x.xx    |
| RVESV                                        | xx.x ± x.x         | xx.x ± x.x        | xx.x ± x.x                       | x.xx    | xx.x ± x.x         | xx.x ± x.x        | xx.x ± x.x                       | x.xx    | x.xx (x.xx to x.xx)              | x.xx    |
| RVESV index                                  | xx.x ± x.x         | xx.x ± x.x        | xx.x ± x.x                       | x.xx    | xx.x ± x.x         | xx.x ± x.x        | xx.x ± x.x                       | x.xx    | x.xx (x.xx to x.xx)              | x.xx    |
| RVSV                                         | xx.x ± x.x         | xx.x ± x.x        | xx.x ± x.x                       | x.xx    | xx.x ± x.x         | xx.x ± x.x        | xx.x ± x.x                       | x.xx    | x.xx (x.xx to x.xx)              | x.xx    |
| RVSV index                                   | xx.x ± x.x         | xx.x ± x.x        | xx.x ± x.x                       | x.xx    | xx.x ± x.x         | xx.x ± x.x        | xx.x ± x.x                       | x.xx    | x.xx (x.xx to x.xx)              | x.xx    |
| RV CO                                        | xx.x ± x.x         | xx.x ± x.x        | xx.x ± x.x                       | x.xx    | xx.x ± x.x         | xx.x ± x.x        | xx.x ± x.x                       | x.xx    | x.xx (x.xx to x.xx)              | x.xx    |

Data expressed as n (%), p-value from Fisher's tests) or means±standard deviations (p-value from unpaired t-tests).

\*Primary endpoint

310

311

|          |                   |               |
|----------|-------------------|---------------|
| CTU Bern | SAP for: CARE-AMI | Version: v1.0 |
|----------|-------------------|---------------|

|          |                                           |                        |
|----------|-------------------------------------------|------------------------|
| CTU Bern | Template: Statistical Analysis Plan (SAP) | Version: 1             |
|          | Code: CS_STA_TEM-11                       | Valid from: 13.11.2020 |

312 **5.8 Transthoracic echocardiography TTE**

313

314 A Table of variables (which includes the primary outcome and some secondary outcomes) measured  
315 using CT MRI will be produced, measured at baseline and Week 12; with the difference in mean  
316 change comparing paroxetine vs placebo.

Table 6. Transthoracic echocardiography assessments

|                                         | Paroxetine         |                   |                                  |         | Placebo            |                   |                                  |         | Paroxetine vs Placebo            |         |
|-----------------------------------------|--------------------|-------------------|----------------------------------|---------|--------------------|-------------------|----------------------------------|---------|----------------------------------|---------|
|                                         | Baseline<br>(N=xx) | Week 12<br>(N=xx) | Change<br>Week 12 vs<br>Baseline | p-value | Baseline<br>(N=xx) | Week 12<br>(N=xx) | Change<br>Week 12 vs<br>Baseline | p-value | Mean difference<br>of the change | p-value |
| LVEF visual — % (SD)                    | xx.x ± x.x         | xx.x ± x.x        | xx.x ± x.x                       | x.xx    | xx.x ± x.x         | xx.x ± x.x        | xx.x ± x.x                       | x.xx    | x.xx (x.xx to x.xx)              | x.xx    |
| LVEF Simpson biplan — % (SD)            | xx.x ± x.x         | xx.x ± x.x        | xx.x ± x.x                       | x.xx    | xx.x ± x.x         | xx.x ± x.x        | xx.x ± x.x                       | x.xx    | x.xx (x.xx to x.xx)              | x.xx    |
| Pericardial effusion — no. (%)          | x (x.x%)           | x (x.x%)          | xx.x ± x.x                       | x.xx    | x (x.x%)           | x (x.x%)          | xx.x ± x.x                       | x.xx    | x.xx (x.xx to x.xx)              | x.xx    |
| sPAP — mmHg (SD)                        | xx.x ± x.x         | xx.x ± x.x        | xx.x ± x.x                       | x.xx    | xx.x ± x.x         | xx.x ± x.x        | xx.x ± x.x                       | x.xx    | x.xx (x.xx to x.xx)              | x.xx    |
| Right ventricular dysfunction — no. (%) | x (x.x%)           | x (x.x%)          | xx.x ± x.x                       | x.xx    | x (x.x%)           | x (x.x%)          | xx.x ± x.x                       | x.xx    | x.xx (x.xx to x.xx)              | x.xx    |
| LVEDV                                   | xx.x ± x.x         | xx.x ± x.x        | xx.x ± x.x                       | x.xx    | xx.x ± x.x         | xx.x ± x.x        | xx.x ± x.x                       | x.xx    | x.xx (x.xx to x.xx)              | x.xx    |
| LVESV                                   | xx.x ± x.x         | xx.x ± x.x        | xx.x ± x.x                       | x.xx    | xx.x ± x.x         | xx.x ± x.x        | xx.x ± x.x                       | x.xx    | x.xx (x.xx to x.xx)              | x.xx    |
| LVEDD                                   | xx.x ± x.x         | xx.x ± x.x        | xx.x ± x.x                       | x.xx    | xx.x ± x.x         | xx.x ± x.x        | xx.x ± x.x                       | x.xx    | x.xx (x.xx to x.xx)              | x.xx    |
| IVSD                                    | xx.x ± x.x         | xx.x ± x.x        | xx.x ± x.x                       | x.xx    | xx.x ± x.x         | xx.x ± x.x        | xx.x ± x.x                       | x.xx    | x.xx (x.xx to x.xx)              | x.xx    |
| PWD                                     | xx.x ± x.x         | xx.x ± x.x        | xx.x ± x.x                       | x.xx    | xx.x ± x.x         | xx.x ± x.x        | xx.x ± x.x                       | x.xx    | x.xx (x.xx to x.xx)              | x.xx    |
| Aortic regurgitation — no. (%)          |                    |                   |                                  | x.xx    |                    |                   |                                  | x.xx    | x.xx (x.xx to x.xx)              | x.xx    |
| none                                    | x (x.x%)           | x (x.x%)          | xx.x ± x.x                       |         | x (x.x%)           | x (x.x%)          | xx.x ± x.x                       |         | x.xx (x.xx to x.xx)              |         |
| trivial / trace                         | x (x.x%)           | x (x.x%)          | xx.x ± x.x                       |         | x (x.x%)           | x (x.x%)          | xx.x ± x.x                       |         | x.xx (x.xx to x.xx)              |         |
| light                                   | x (x.x%)           | x (x.x%)          | xx.x ± x.x                       |         | x (x.x%)           | x (x.x%)          | xx.x ± x.x                       |         | x.xx (x.xx to x.xx)              |         |
| moderate                                | x (x.x%)           | x (x.x%)          | xx.x ± x.x                       |         | x (x.x%)           | x (x.x%)          | xx.x ± x.x                       |         | x.xx (x.xx to x.xx)              |         |
| Aortic stenosis — no. (%)               |                    |                   |                                  | x.xx    |                    |                   |                                  | x.xx    | x.xx (x.xx to x.xx)              | x.xx    |
| none                                    | x (x.x%)           | x (x.x%)          | xx.x ± x.x                       |         | x (x.x%)           | x (x.x%)          | xx.x ± x.x                       |         | x.xx (x.xx to x.xx)              |         |
| trivial / trace                         | x (x.x%)           | x (x.x%)          | xx.x ± x.x                       |         | x (x.x%)           | x (x.x%)          | xx.x ± x.x                       |         | x.xx (x.xx to x.xx)              |         |
| light                                   | x (x.x%)           | x (x.x%)          | xx.x ± x.x                       |         | x (x.x%)           | x (x.x%)          | xx.x ± x.x                       |         | x.xx (x.xx to x.xx)              |         |
| moderate                                | x (x.x%)           | x (x.x%)          | xx.x ± x.x                       |         | x (x.x%)           | x (x.x%)          | xx.x ± x.x                       |         | x.xx (x.xx to x.xx)              |         |
| Mitral regurgitation — no. (%)          |                    |                   |                                  | x.xx    |                    |                   |                                  | x.xx    | x.xx (x.xx to x.xx)              | x.xx    |
| none                                    | x (x.x%)           | x (x.x%)          | xx.x ± x.x                       |         | x (x.x%)           | x (x.x%)          | xx.x ± x.x                       |         | x.xx (x.xx to x.xx)              |         |
| trivial / trace                         | x (x.x%)           | x (x.x%)          | xx.x ± x.x                       |         | x (x.x%)           | x (x.x%)          | xx.x ± x.x                       |         | x.xx (x.xx to x.xx)              |         |
| light                                   | x (x.x%)           | x (x.x%)          | xx.x ± x.x                       |         | x (x.x%)           | x (x.x%)          | xx.x ± x.x                       |         | x.xx (x.xx to x.xx)              |         |
| moderate                                | x (x.x%)           | x (x.x%)          | xx.x ± x.x                       |         | x (x.x%)           | x (x.x%)          | xx.x ± x.x                       |         | x.xx (x.xx to x.xx)              |         |
| Mitral stenosis — no. (%)               |                    |                   |                                  | x.xx    |                    |                   |                                  | x.xx    | x.xx (x.xx to x.xx)              | x.xx    |
| none                                    | x (x.x%)           | x (x.x%)          | xx.x ± x.x                       |         | x (x.x%)           | x (x.x%)          | xx.x ± x.x                       |         | x.xx (x.xx to x.xx)              |         |
| trivial / trace                         | x (x.x%)           | x (x.x%)          | xx.x ± x.x                       |         | x (x.x%)           | x (x.x%)          | xx.x ± x.x                       |         | x.xx (x.xx to x.xx)              |         |
| light                                   | x (x.x%)           | x (x.x%)          | xx.x ± x.x                       |         | x (x.x%)           | x (x.x%)          | xx.x ± x.x                       |         | x.xx (x.xx to x.xx)              |         |
| moderate                                | x (x.x%)           | x (x.x%)          | xx.x ± x.x                       |         | x (x.x%)           | x (x.x%)          | xx.x ± x.x                       |         | x.xx (x.xx to x.xx)              |         |
| Tricuspid regurgitation — no. (%)       |                    |                   |                                  | x.xx    |                    |                   |                                  | x.xx    | x.xx (x.xx to x.xx)              | x.xx    |
| none                                    | x (x.x%)           | x (x.x%)          | xx.x ± x.x                       |         | x (x.x%)           | x (x.x%)          | xx.x ± x.x                       |         | x.xx (x.xx to x.xx)              |         |
| trivial / trace                         | x (x.x%)           | x (x.x%)          | xx.x ± x.x                       |         | x (x.x%)           | x (x.x%)          | xx.x ± x.x                       |         | x.xx (x.xx to x.xx)              |         |
| light                                   | x (x.x%)           | x (x.x%)          | xx.x ± x.x                       |         | x (x.x%)           | x (x.x%)          | xx.x ± x.x                       |         | x.xx (x.xx to x.xx)              |         |
| moderate                                | x (x.x%)           | x (x.x%)          | xx.x ± x.x                       |         | x (x.x%)           | x (x.x%)          | xx.x ± x.x                       |         | x.xx (x.xx to x.xx)              |         |

Data expressed as n (%), p-value from Fisher's tests) or means ± standard deviations (p-value from unpaired t-tests

\*Primary endpoint

sPAP = RV/RA + ZVD

317

318

|          |                   |               |
|----------|-------------------|---------------|
| CTU Bern | SAP for: CARE-AMI | Version: v1.0 |
|----------|-------------------|---------------|

|          |                                           |                        |
|----------|-------------------------------------------|------------------------|
| CTU Bern | Template: Statistical Analysis Plan (SAP) | Version: 1             |
|          | Code: CS_STA_TEM-11                       | Valid from: 13.11.2020 |

319 **5.9 Safety assessment in Safety Population**

320

 321 A Table of clinical events up to Week 12 will be produced. Due to the low patient number, a compari-  
 322 son with Fisher's exact test will be conducted, only counting one event of the same type within the  
 323 same patient. For instance, if the patient had two Myocardial infarctions, then only the first Myocardial  
 324 infarction will be considered for the Fisher's exact test. It is suggested to add details of some events in  
 325 the subheader of the Table, as relevant and applicable (e.g. rare events, events leading to IMP stop).  
 326

**Table 7. Safety assessment in Safety Population (took at least one dosage of IMP)**

|                                                                | Paroxetine<br>(N=xx)   | Placebo<br>(N=xx)      | p-value |
|----------------------------------------------------------------|------------------------|------------------------|---------|
| Death                                                          | x (x.x%)               | x (x.x%)               | x.xx    |
| Myocardial infarction*                                         | x in x patients (x.x%) | x in x patients (x.x%) | x.xx    |
| Definite stent thrombosis                                      | x in x patients (x.x%) | x in x patients (x.x%) | x.xx    |
| Repeat unplanned PCI or CABG                                   | x in x patients (x.x%) | x in x patients (x.x%) | x.xx    |
| Cerebrovascular event                                          |                        |                        |         |
| Stroke                                                         | x in x patients (x.x%) | x in x patients (x.x%) | x.xx    |
| ischemic                                                       | x in x patients (x.x%) | x in x patients (x.x%) | x.xx    |
| hemorrhagic                                                    | x in x patients (x.x%) | x in x patients (x.x%) | x.xx    |
| unclear etiology                                               | x in x patients (x.x%) | x in x patients (x.x%) | x.xx    |
| TIA                                                            | x in x patients (x.x%) | x in x patients (x.x%) | x.xx    |
| Amaurosis fugax                                                | x in x patients (x.x%) | x in x patients (x.x%) | x.xx    |
| Bleeding                                                       |                        |                        |         |
| TIMI major or minor                                            | x in x patients (x.x%) | x in x patients (x.x%) | x.xx    |
| GUSTO moderate or severe                                       | x in x patients (x.x%) | x in x patients (x.x%) | x.xx    |
| BARC 2                                                         | x in x patients (x.x%) | x in x patients (x.x%) | x.xx    |
| BARC 3abc                                                      | x in x patients (x.x%) | x in x patients (x.x%) | x.xx    |
| BARC 4                                                         | x in x patients (x.x%) | x in x patients (x.x%) | x.xx    |
| BARC 5ab                                                       | x in x patients (x.x%) | x in x patients (x.x%) | x.xx    |
| Acute renal failure**                                          | x in x patients (x.x%) | x in x patients (x.x%) | x.xx    |
| Major vascular complication                                    | x in x patients (x.x%) | x in x patients (x.x%) | x.xx    |
| Pacemaker implanted during PCI                                 | x in x patients (x.x%) | x in x patients (x.x%) | x.xx    |
| Resuscitation during PCI                                       | x in x patients (x.x%) | x in x patients (x.x%) | x.xx    |
| Potential serious adverse event other than any<br>of the above | x in x patients (x.x%) | x in x patients (x.x%) | x.xx    |
| Mild                                                           | x in x patients (x.x%) | x in x patients (x.x%) | x.xx    |
| Moderate                                                       | x in x patients (x.x%) | x in x patients (x.x%) | x.xx    |
| Severe                                                         | x in x patients (x.x%) | x in x patients (x.x%) | x.xx    |

|          |                   |               |
|----------|-------------------|---------------|
| CTU Bern | SAP for: CARE-AMI | Version: v1.0 |
|----------|-------------------|---------------|

|          |                                           |                        |               |
|----------|-------------------------------------------|------------------------|---------------|
| CTU Bern | Template: Statistical Analysis Plan (SAP) | Version: 1             |               |
|          | Code: CS_STA_TEM-11                       | Valid from: 13.11.2020 | Page 23 of 27 |

p-values from Fisher's exact tests, not counting multiple events of the same type if occurred within the same patient.

\* Type 1 in xx, Type 2 in xx, Type 3 in xx, Type 4a in xx, Type 4b in xx; and Type 5 in xx {replace xx with paroxetine or placebo}

\*\* Rifle score y in xx, etc {replace xx with paroxetine or placebo}

327

## 328 5.10 Physical examination

329 A Table of physical examinations at Baseline and at Week 12 will be produced.

330

**Table 8 Physical examinations**

|                                        | Baseline (48h to 96h after PCI) |                   |         | Week 12 follow-up    |                   |         |
|----------------------------------------|---------------------------------|-------------------|---------|----------------------|-------------------|---------|
|                                        | Paroxetine<br>(N=xx)            | Placebo<br>(N=xx) | p-value | Paroxetine<br>(N=xx) | Placebo<br>(N=xx) | p-value |
| Heart rate — beats/minute (SD)         | xx.x ± x.x                      | xx.x ± x.x        | x.xx    | xx.x ± x.x           | xx.x ± x.x        | x.xx    |
| RR systolic (1st measure) — mmHg (SD)  | xx.x ± x.x                      | xx.x ± x.x        | x.xx    | xx.x ± x.x           | xx.x ± x.x        | x.xx    |
| RR diastolic (1st measure) — mmHg (SD) | xx.x ± x.x                      | xx.x ± x.x        | x.xx    | xx.x ± x.x           | xx.x ± x.x        | x.xx    |
| Temperature (°C)                       | xx.x ± x.x                      | xx.x ± x.x        | x.xx    | xx.x ± x.x           | xx.x ± x.x        | x.xx    |
| Oxygen saturation (%)                  | xx.x ± x.x                      | xx.x ± x.x        | x.xx    | xx.x ± x.x           | xx.x ± x.x        | x.xx    |
| NYHA                                   | x (x.x%)                        | x (x.x%)          | x.xx    | x (x.x%)             | x (x.x%)          | x.xx    |
| I                                      | x (x.x%)                        | x (x.x%)          | x.xx    | x (x.x%)             | x (x.x%)          | x.xx    |
| II                                     | x (x.x%)                        | x (x.x%)          | x.xx    | x (x.x%)             | x (x.x%)          | x.xx    |
| III                                    | x (x.x%)                        | x (x.x%)          | x.xx    | x (x.x%)             | x (x.x%)          | x.xx    |
| IV                                     | x (x.x%)                        | x (x.x%)          | x.xx    | x (x.x%)             | x (x.x%)          | x.xx    |
| Weight — kg (SD)                       | xx.x ± x.x                      | xx.x ± x.x        | x.xx    |                      |                   |         |
| Height — m (SD)                        | xx.x ± x.x                      | xx.x ± x.x        | x.xx    |                      |                   |         |
| BMI — kg/m <sup>2</sup> (SD)           | xx.x ± x.x                      | xx.x ± x.x        | x.xx    |                      |                   |         |

Data expressed as n (%), p-value from Fisher's tests) or means ± standard deviations (p-value from unpaired t-tests).

331

RR: Riva-Rocci

## 332 5.11 Withdrawal/follow-up

333

334 Withdrawal, lost-to-follow-up and missed assessments of the primary outcome will be reported in the  
335 flowchart.

|          |                   |               |
|----------|-------------------|---------------|
| CTU Bern | SAP for: CARE-AMI | Version: v1.0 |
|----------|-------------------|---------------|

|          |                                           |                        |
|----------|-------------------------------------------|------------------------|
| CTU Bern | Template: Statistical Analysis Plan (SAP) | Version: 1             |
|          | Code: CS_STA_TEM-11                       | Valid from: 13.11.2020 |



336 **6. Analysis**

337 **6.1 Outcome definitions**

338 **6.1.1 Primary outcomes**

339

340 The primary endpoint will be the difference in the change ( $\Delta$ ) in LVEF at 12 weeks in subjects  
341 treated with paroxetine 20 mg QD or placebo QD as assessed by cMRI.

342 **6.1.2 Secondary outcomes**

343

344 Secondary outcomes of the MRI assessment are:

345 in left left-ventricular end-diastolic volume (LVEDV) between baseline and 12 weeks in subjects treat-  
346 ed with paroxetine 20 mg QD or placebo QD as assessed by cardiac MRI.

347 - in left left-ventricular end-systolic volume (LVESV) between baseline and 12 weeks in subjects treat-  
348 ed with paroxetine 20 mg QD or placebo QD as assessed by cardiac MRI.

349 - in late-enhancement between baseline and 12 weeks in subjects treated with paroxetine 20 mg QD  
350 or placebo QD as assessed by cardiac MRI.

351 Secondary outcomes using the TTE assessment are:

352 - in LVEF between baseline and 12 weeks, and 12 months, respectively in subjects treated with par-  
353 oxetine 20 mg QD or placebo QD as assessed by transthoracic echocardiography.

354 Secondary outcomes of the event reporting and clinical assessments are:

355 - major adverse cardiac events (cardiac death, myocardial infarction, repeat hospitalization for heart  
356 failure) at 12 weeks and 12 months, respectively.

357 - clinical symptoms of heart failure as assessed by New York Heart Association (NYHA) at 12  
358 weeks and 12 months, respectively.

359 **6.1.3 Safety outcomes**

360

361 Incidence and severity of side effects related to study drug intake throughout the entire study.

362 The safety outcomes (AE and SAEs) reporting will be performed as tables or single listing if only a few  
363 events occurred.

364

|          |                   |               |
|----------|-------------------|---------------|
| CTU Bern | SAP for: CARE-AMI | Version: v1.0 |
|----------|-------------------|---------------|

|          |                                           |                        |
|----------|-------------------------------------------|------------------------|
| CTU Bern | Template: Statistical Analysis Plan (SAP) | Version: 1             |
|          | Code: CS_STA_TEM-11                       | Valid from: 13.11.2020 |

365 **6.2 Analysis methods**

366

367 **6.2.1 Primary analysis**

368 The primary outcome analysis will be conducted by calculating the change in the value week 12 –  
369 baseline (“change”) and then calculating the mean difference of the change in paroxetine patients  
370 vs the change in the placebo patients.

371 **6.2.2 Secondary analyses**

372 The secondary outcome TTE analyses will be conducted by calculating the change in the value  
373 week 12 – baseline (“change”) and then calculating the mean difference of the change in paroxe-  
374 tine patients vs the change in the placebo patients.

375 The secondary outcome NYHA can be analyzed as binary improvement in NYHA if requested (e.g.  
376 improved from IV to III, or III to II, or II to I).

377 **6.2.3 Sensitivity analyses**

378 The primary and secondary outcomes will be analyses in the multiple imputed data-sets if applica-  
379 ble (see 4.3).

380 **6.2.4 Additional analyses**

381 No additional analyses are planned currently.

382 **6.2.5 Assessment of statistical assumptions**

383 Proportional hazards tests will be performed on the time to event safety (secondary) outcomes, in  
384 case there are sufficient events of that type up to one year of follow-up.

385

386 **6.3 Missing data**

387

388 The primary and secondary outcomes will be analyses in the multiple imputed data-sets if applica-  
389 ble (see 4.3).

390

391 **6.4 Safety evaluation**

392

393 The safety outcomes, AE and SAEs will be summarized in tables at 12 weeks and separately at 12  
394 months.

395 **6.5 Statistical software**

396

|          |                   |               |
|----------|-------------------|---------------|
| CTU Bern | SAP for: CARE-AMI | Version: v1.0 |
|----------|-------------------|---------------|

|          |                                           |                        |
|----------|-------------------------------------------|------------------------|
| CTU Bern | Template: Statistical Analysis Plan (SAP) | Version: 1             |
|          | Code: CS_STA_TEM-11                       | Valid from: 13.11.2020 |

397 Stata version 16.1 or higher and R version 4.03 or higher will be used.

398 **6.6 Quality control**

399 The primary and secondary MRI and secondary TTE outcomes will be double-programmed.

400 **7. References**

401

402 European Medicines Agency, Committee for Human Medicinal Products; Draft ICH E9 (R1) addendum  
403 on estimands and sensitivity analysis in clinical trials to the guideline on statistical principles for clinical  
404 trials, step 2b - Revision 1. 30 August 2017.

405 SOP Data preparation and data analysis, CS\_STA\_SOP-05, version 04, 11.09.2018

406 SOP Statistical data validation, CS\_STA\_SOP\_02, version 03, 11.09.2018

407 StataCorp. 2020. Stata Statistical Software: Release 16.1. College Station, TX: StataCorp LLC

408 R Development Core Team. 2008. R: A language and environment for statistical computing. R Foun-  
409 dation for Statistical Computing. Vienna, Austria

410 Schumacher, Sarah M, Gao, Erhe, Zhu, Weizhong, et al. Paroxetine-mediated GRK2 inhibition re-  
411 verses cardiac dysfunction and remodeling after myocardial infarction. *Science Translational*  
412 *Medicine*. 2015; 7(277): 277ra31

|          |                   |               |
|----------|-------------------|---------------|
| CTU Bern | SAP for: CARE-AMI | Version: v1.0 |
|----------|-------------------|---------------|

|          |                                           |                        |
|----------|-------------------------------------------|------------------------|
| CTU Bern | Template: Statistical Analysis Plan (SAP) | Version: 1             |
|          | Code: CS_STA_TEM-11                       | Valid from: 13.11.2020 |
