# Supplementary material
Source: PubMed Central journal article supplement (PMC8281020)
Supplement: jamacardiol-e212247-s004.pdf [file jamacardiol-e212247-s004.pdf]

## Data Sharing Statement

### Data

**Data available:** Yes

**Data types:** Deidentified participant data

**How to access data:** Data will be deposited at <https://boris.unibe.ch/> (DOI: xxx) where also study proposals can be filed.

**When available:** With publication

### Supporting Documents

**Document types:** None

### Additional Information

**Who can access the data:** Data will be made available to researchers whose proposed use of the data has been approved.

**Types of analyses:** Data will be made available for any non-commercial purpose.

**Mechanisms of data availability:** Data will be made available after approval of a proposal.
